# Supplementary material for: Quantifying CO 2 emissions of a city with the Copernicus Anthropogenic CO 2 Monitoring satellite mission
Source: Copernicus journal article supplement (doi:10.5194/amt-2020-162), 2020-06-30
Supplement: Supplementary file 1 [file amt-2020-162-supplement.pdf]

## S1 Arc length and distance from the center line

For the mass-balance approach, a two-dimensional curve  $p(r)$  is fitted that consists of two parabolic polynomials:

$$x(r) = a_0 r^2 + a_1 r + a_2 \quad (1)$$

$$y(r) = b_0 r^2 + b_1 r + b_2 \quad (2)$$

- 5 with coefficients  $a_k$  and  $b_k$  and radial distance  $r$ . The parameter is calculated as the distance from the origin

$$r = \sqrt{(x - x_o)^2 + (y - y_o)^2} \quad (3)$$

where  $x$  and  $y$  are easting and northing in the "DHDN / Soldner Berlin" spatial reference system (EPSG: 3068).

- To convert pixel coordinates in easting and northing to plume coordinates, we need to compute the arc length of the curve from the origin of the source  $x_p$  and the distance of the pixel center from the curve  $y_p$ . The minimum distance can be found by minimizing the following equation

$$\min_r [(x(r) - p_x)^2 + (y(r) - p_y)^2] \quad (4)$$

- which can be done by substituting  $x(r)$  and  $y(r)$ , taking the first derivative and finding the values for  $r$  where the first derivative is equal to zero. The steps were executed using the Sympy Library ([www.sympy.org](http://www.sympy.org)), which is a Python library for symbolic computing. The result is a cubic equation for which the roots can be computed using the general cubic formula (e.g. [https://en.wikipedia.org/wiki/Cubic\\_equation#General\\_cubic\\_formula](https://en.wikipedia.org/wiki/Cubic_equation#General_cubic_formula)). The shortest distance to the curve was used in case of multiple (real) solutions. The sign for the distance was assigned a negative value if the pixel was on the right side of the curve when viewed from the source location and positive otherwise.

- The along-plume distance is the arc length  $x_p$  from the source origin to the point where the satellite pixel is perpendicular to the curve. The arc length for a parametric curve (computed from the source origin to the points computed above) is

$$s = \int_a^b \sqrt{\left(\frac{\partial x(r)}{\partial r}\right)^2 + \left(\frac{\partial y(r)}{\partial r}\right)^2} \quad (5)$$

which with Eq. (1) results in the integral over the square root of a quadratic polynomial whose solution can be found in most integral tables (e.g. Eq. (37) on <http://integral-table.com/>):

$$\int \sqrt{ax^2 + bx + c} \, dx = \frac{b + 2ax}{4a} \sqrt{ax^2 + bx + c} + \frac{4ac - b^2}{8a^{3/2}} \ln \left| 2ax + b + 2\sqrt{a(ax^2 + bx + c)} \right|. \quad (6)$$

## 25 S2 Hermite spline

The seasonal cycle is fitted by a cubic Hermite spline with periodic boundary conditions:

$$s(\xi) = p_k \cdot (1 + 2\xi)(1 - \xi)^2 + m_k \cdot \xi(1 - \xi)^2 + p_{k+1} \cdot \xi^2(3 - 2\xi) + m_{k+1} \cdot \xi^2(\xi - 1) \quad (7)$$

with control points  $p_k$  and three-point difference  $m_k$ .

### S3 Additional figures

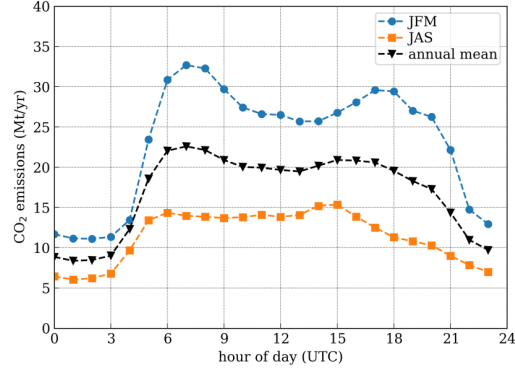

**Figure S1.** Diurnal cycle of Berlin's CO<sub>2</sub> emissions for winter (JFM: January, February and March) and summer (JAS: July, August and September).

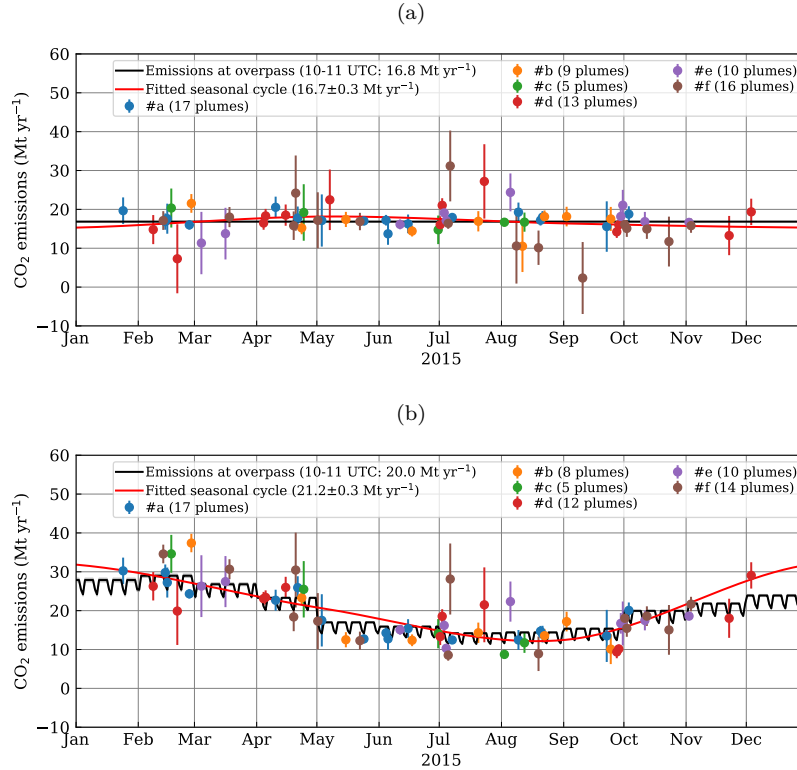

**Figure S2.** Time series of CO<sub>2</sub> emissions of Berlin estimated with the analytical inversion using six satellites with  $\sigma_{\text{VEG50}}$  of 0.7 ppm for (a) constant and (b) time-varying emissions. Emission estimates with uncertainties larger than 10.0 Mt yr<sup>-1</sup> (50% of mean emissions at 11:30 local time) are not shown.

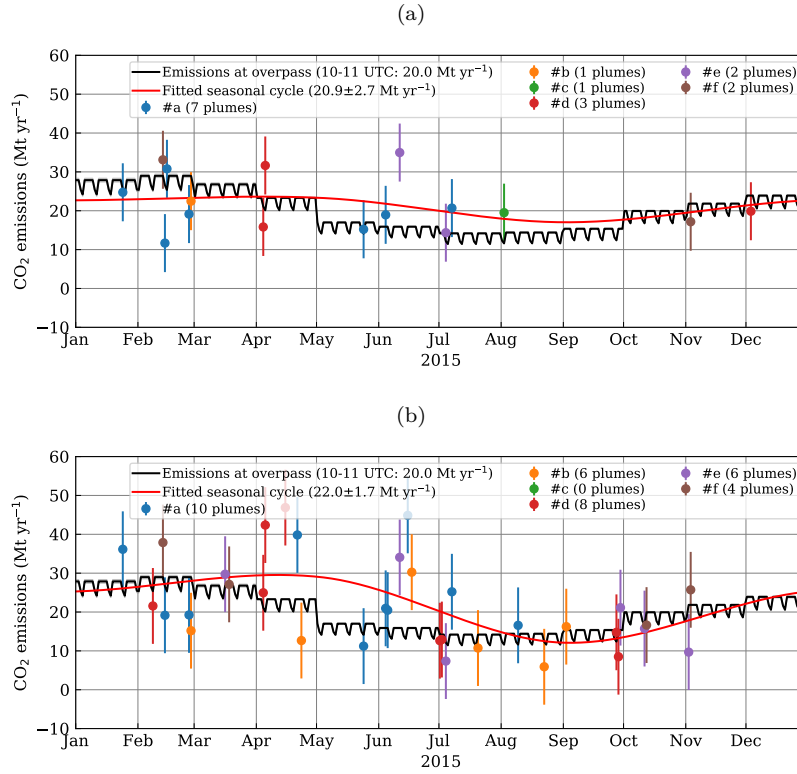

**Figure S3.** Time series of estimated CO<sub>2</sub> emissions of Berlin using a constellation of six satellites with medium noise instruments ( $\sigma_{\text{VEG50}} = 0.7$  ppm). The plumes were detected from (a) the CO<sub>2</sub> and (b) the NO<sub>2</sub> observations. The error bars show constant errors of  $10.0 \text{ Mt yr}^{-1}$  corresponding to the standard deviation of the differences between estimated and real emissions.

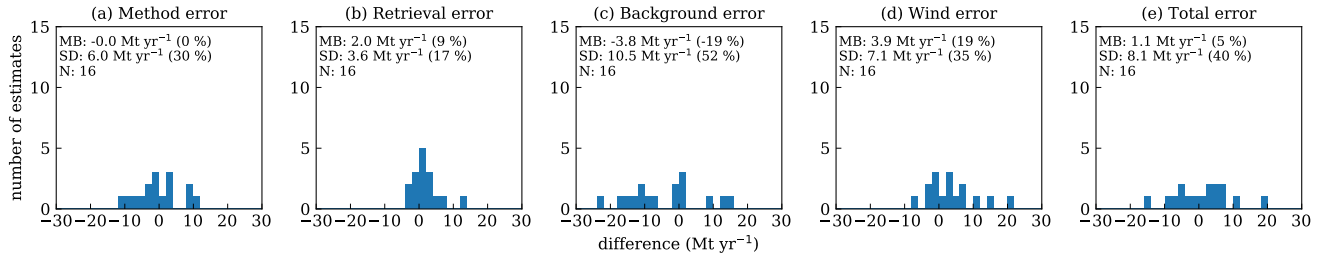

**Figure S4.** Histograms of (a) method, (b) retrieval, (c) background, (d) wind and (e) total errors for the emissions estimated by the mass-balance approach. The values are for plumes detected with the medium noise CO<sub>2</sub> observations ( $\sigma_{\text{VEG50}} = 0.7$  ppm) and line densities computed from the sub-polygon means.

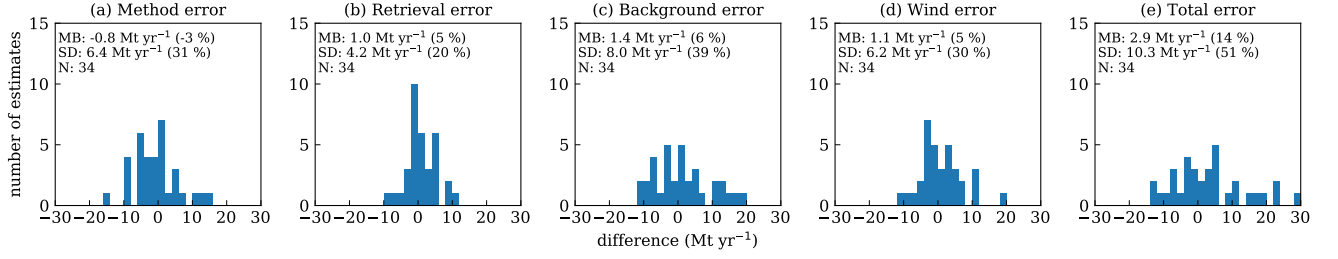

**Figure S5.** Same as Fig. S4 but for plumes detected from NO<sub>2</sub> observations.

## S4 Additional tables

**Table S1.** Relative mean bias (MB in %) and standard deviation (SD in %) for method, retrieval, background, wind and total error using the CO<sub>2</sub> observations for detecting the plume.

| $\sigma_{\text{VEG50}}$ (ppm) | Method error |     |     | Retrieval error |     |     | Background error |     |     | Wind error |     |     | Total error |     |     |
|-------------------------------|--------------|-----|-----|-----------------|-----|-----|------------------|-----|-----|------------|-----|-----|-------------|-----|-----|
|                               | 0.5          | 0.7 | 1.0 | 0.5             | 0.7 | 1.0 | 0.5              | 0.7 | 1.0 | 0.5        | 0.7 | 1.0 | 0.5         | 0.7 | 1.0 |
| MB (sub-polygons)             | 4            | -0  | -1  | 7               | 10  | 13  | -13              | -19 | -27 | 14         | 19  | 22  | 8           | 5   | 3   |
| MB (Gauss)                    | 7            | 4   | 3   | 13              | 17  | 14  | -13              | -12 | -23 | 15         | 19  | 21  | 17          | 21  | 12  |
| SD (sub-polygons)             | 32           | 30  | 33  | 17              | 18  | 22  | 57               | 53  | 49  | 39         | 35  | 35  | 47          | 40  | 45  |
| SD (Gauss)                    | 32           | 32  | 33  | 20              | 31  | 29  | 49               | 52  | 47  | 39         | 35  | 35  | 50          | 47  | 47  |

**Table S2.** Relative mean bias (MB in %) and standard deviation (SD in %) for method, retrieval, background, wind and total error using the NO<sub>2</sub> observations for detecting the plume.

| $\sigma_{\text{VEG50}}$ (ppm) | Method error |     |     | Retrieval error |     |     | Background error |     |     | Wind error |     |     | Total error |     |     |
|-------------------------------|--------------|-----|-----|-----------------|-----|-----|------------------|-----|-----|------------|-----|-----|-------------|-----|-----|
|                               | 0.5          | 0.7 | 1.0 | 0.5             | 0.7 | 1.0 | 0.5              | 0.7 | 1.0 | 0.5        | 0.7 | 1.0 | 0.5         | 0.7 | 1.0 |
| MB (sub-polygons)             | -4           | -4  | -4  | 4               | 5   | 7   | 7                | 7   | 7   | 5          | 5   | 5   | 13          | 15  | 17  |
| MB (Gauss CO2)                | -3           | -3  | -3  | 5               | 8   | 17  | 13               | 14  | 16  | 6          | 6   | 6   | 22          | 26  | 31  |
| MB (Gauss CO2+NO2)            | -3           | -3  | 1   | 5               | 9   | 14  | 13               | 15  | 14  | 6          | 6   | 3   | 18          | 22  | 25  |
| SD (sub-polygons)             | 32           | 32  | 32  | 15              | 21  | 30  | 39               | 40  | 42  | 31         | 31  | 31  | 51          | 51  | 53  |
| SD (Gauss CO2)                | 33           | 33  | 33  | 17              | 21  | 27  | 34               | 35  | 37  | 31         | 31  | 31  | 46          | 48  | 55  |
| SD (Gauss CO2+NO2)            | 33           | 33  | 32  | 13              | 16  | 25  | 34               | 36  | 38  | 31         | 31  | 28  | 41          | 42  | 45  |
